# Supplementary material for: Xist reduction in breast cancer upregulates AKT phosphorylation via HDAC3-mediated repression of PHLPP1 expression
Source: PubMed Central journal article supplement (PMC5190021; doi:10.18632/oncotarget.9673), 2016-05-27
Supplement: oncotarget-07-43256-s001.pdf [file oncotarget-07-43256-s001.pdf]

## ***Xist* reduction in breast cancer upregulates AKT phosphorylation via HDAC3-mediated repression of PHLPP1 expression**

### Supplementary Materials

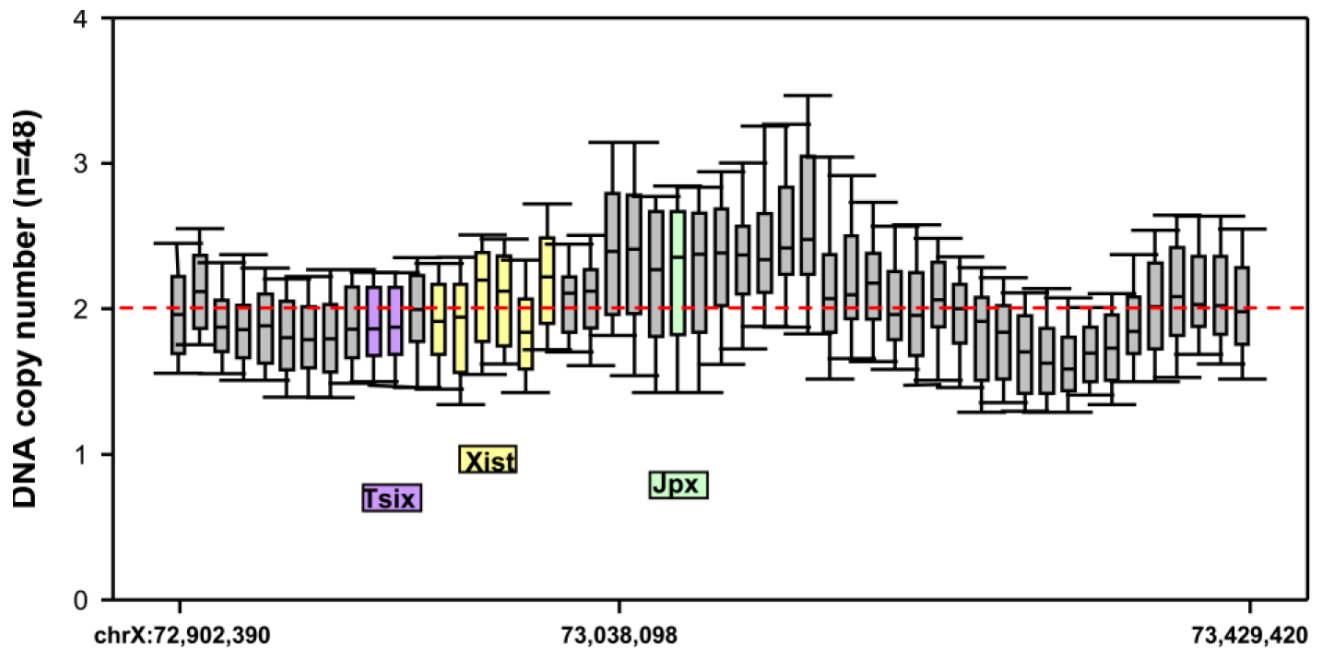

**Supplementary Figure S1: DNA copy number at the locus of *Xist*, *Tsix* and *Jpx* in clinical breast cancers.** The regions displayed include chromosome X from 72,902,390 to 73,429,420. The locations of *Xist*, *Tsix*, and *Jpx* are indicated.

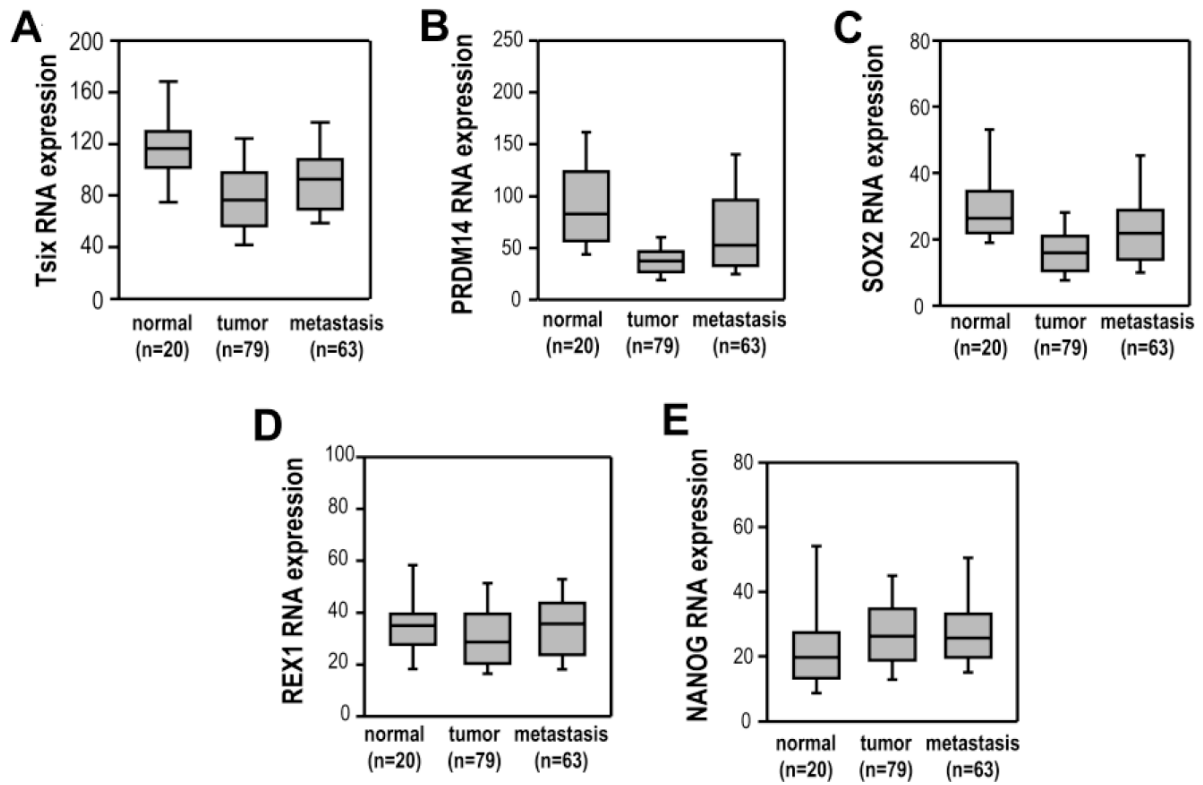

**Supplementary Figure S2: The expression levels of the *Xist* negative regulators were not increased in breast cancer samples.** (A–E) Analyses of *Tsix*, *PRDM14*, *SOX2*, *REX1* and *NANOG* expression levels in breast normal and tumor samples using the GEO data sets.
